# Supplementary material for: Expression and Activation of the NF-κB Pathway Correlates with Methotrexate Resistance and Cell Proliferation in Acute Lymphoblastic Leukemia
Source: Preprints.org preprint supplement (doi:10.20944/preprints202308.1402.v1), 2023-08-19
Supplement: Supplementary file 2 [file Supplementary_Table_1.docx]

**Supplementary Table 1.** MTX IC50 values (nmol/l).

| Cell line | 48 h | 96 h |
| --- | --- | --- |
| *T-ALL* |  |  |
| HPB-ALL | 85.55* | 38.42 |
| Jurkat | 10.88 | 35.95 |
| Molt-4 | 31.26 | 19.56 |
| CCRF-CEM | 33.75 | 12.80 |
| TALL-1 | 14.24 | 12.45 |
| P12-ICHIKAWA | 13.75 | 11.77 |
| ALL-SIL | 69.55 | 5.52 |
| *BCP-ALL* |  |  |
| Nalm16 | 91.78* | 32.96 |
| RS4;11 | 40.56 | 17.89 |
| 697 | 19.95 | 17.06 |
| Nalm30 | 100.80* | 14.15 |
| Nalm6 | 18.37 | 11.61 |
| REH | 14.97 | 9.16 |

*mathematical estimates in cases when survival remained >50% in relation to control even at the highest doses tested.
