# Supplementary material for: Expression and Activation of the NF-κB Pathway Correlates with Methotrexate Resistance and Cell Proliferation in Acute Lymphoblastic Leukemia
Source: Preprints.org preprint supplement (doi:10.20944/preprints202308.1402.v1), 2023-08-19
Supplement: Supplementary file 3 [file Supplementary_Table_2.xlsx]

## Sheet: Sheet1
Supplementary Table 2. Spearman's r and p-values for correlations between doubling time, MTX resistance, Hallmark "TNF-α signaling via NF-κB" NES, NF-κB family gene expression, and fold change of NF-κB activation by MTX or TNF-α in different time points.
Spearman correlation (r)	Doubling time	MTX IC50 (48h)	Hallmark "TNF-α via NF-κB" (NES)	TNF (FPKM)	NFKB1 (FPKM)	NFKB2 (FPKM)	REL (FPKM)	RELA (FPKM)	RELB (FPKM)	∆NF-κB activation by MTX (9h)	∆NF-κB activation by TNF-α (9h)	∆NF-κB activation by MTX (16h)	∆NF-κB activation by TNF-α (16h)	∆NF-κB activation by MTX (24h)	∆NF-κB activation by TNF-α (24h)
Doubling time	1	0.692308	0.659341	0.489011	0.395604	-0.552448	-0.21978	0.510989	0.5	0.0979021	0.713287	0.370629	0.657343	0.237762	0.643357
MTX IC50 (48 h)	0.692308	1	0.60989	0.0934066	0.543956	-0.839161	-0.412088	0.450549	0.252747	-0.482517	0.559441	0.167832	0.587413	0.328671	0.762238
Hallmark "TNF-α via NF-κB" (NES)	0.659341	0.60989	1	0.274725	0.82967	-0.440559	-0.598901	0.5	0.521978	0.0979021	0.832168	0.356643	0.769231	0.0769231	0.783217
TNF (FPKM)	0.489011	0.0934066	0.274725	1	-0.137363	-0.216783	0.0549451	0.252747	0.0274725	0.230769	0.20979	0.048951	0.125874	-0.538462	0.048951
NFKB1 (FPKM)	0.395604	0.543956	0.82967	-0.137363	1	-0.188811	-0.615385	0.247253	0.340659	0.020979	0.706294	0.286713	0.657343	0.27972	0.664336
NFKB2 (FPKM)	-0.552448	-0.839161	-0.440559	-0.216783	-0.188811	1	0.405594	-0.524476	-0.244755	0.454545	-0.4	-0.372727	-0.509091	-0.263636	-0.681818
REL (FPKM)	-0.21978	-0.412088	-0.598901	0.0549451	-0.615385	0.405594	1	-0.576923	-0.0659341	0.0839161	-0.594406	-0.00699301	-0.475524	-0.0769231	-0.594406
RELA (FPKM)	0.510989	0.450549	0.5	0.252747	0.247253	-0.524476	-0.576923	1	0.313187	-0.272727	0.454545	0.013986	0.314685	0.272727	0.573427
RELB (FPKM)	0.5	0.252747	0.521978	0.0274725	0.340659	-0.244755	-0.0659341	0.313187	1	0.048951	0.475524	0.587413	0.482517	0.265734	0.552448
∆NF-κB activation by MTX (9h)	0.0979021	-0.482517	0.0979021	0.230769	0.020979	0.454545	0.0839161	-0.272727	0.048951	1	0.307692	0.356643	0.272727	-0.132867	-0.0979021
∆NF-κB activation by TNF-α (9h)	0.713287	0.559441	0.832168	0.20979	0.706294	-0.4	-0.594406	0.454545	0.475524	0.307692	1	0.447552	0.951049	0.258741	0.881119
∆NF-κB activation by MTX (16h)	0.370629	0.167832	0.356643	0.048951	0.286713	-0.372727	-0.00699301	0.013986	0.587413	0.356643	0.447552	1	0.594406	0.545455	0.48951
∆NF-κB activation by TNF-α (16h)	0.657343	0.587413	0.769231	0.125874	0.657343	-0.509091	-0.475524	0.314685	0.482517	0.272727	0.951049	0.594406	1	0.328671	0.902098
∆NF-κB activation by MTX (24h)	0.237762	0.328671	0.0769231	-0.538462	0.27972	-0.263636	-0.0769231	0.272727	0.265734	-0.132867	0.258741	0.545455	0.328671	1	0.447552
∆NF-κB activation by TNF-α (24h)	0.643357	0.762238	0.783217	0.048951	0.664336	-0.681818	-0.594406	0.573427	0.552448	-0.0979021	0.881119	0.48951	0.902098	0.447552	1
Spearman's p-values	Doubling time	MTX IC50 (48h)	Hallmark "TNF-α via NF-κB" (NES)	TNF (FPKM)	NFKB1 (FPKM)	NFKB2 (FPKM)	REL (FPKM)	RELA (FPKM)	RELB (FPKM)	∆NF-κB activation by MTX (9h)	∆NF-κB activation by TNF-α (9h)	∆NF-κB activation by MTX (16h)	∆NF-κB activation by TNF-α (16h)	∆NF-κB activation by MTX (24h)	∆NF-κB activation by TNF-α (24h)
Doubling time		0.010923	0.016943	0.0929568	0.182217	0.0666567	0.470298	0.077623	0.0850369	0.766437	0.0117658	0.236687	0.0237755	0.457295	0.0278011
MTX IC50 (48 h)	0.010923		0.0302072	0.764664	0.0581575	0.00113644	0.163472	0.12472	0.404311	0.11541	0.0628454	0.603894	0.0488816	0.297333	0.00553262
Hallmark "TNF-α via NF-κB" (NES)	0.016943	0.0302072		0.363258	0.00079422	0.154234	0.0339678	0.0850369	0.0706769	0.766437	0.00134661	0.255964	0.00491497	0.817079	0.00381307
TNF (FPKM)	0.0929568	0.764664	0.363258		0.656082	0.499001	0.863147	0.404311	0.935084	0.470802	0.513713	0.886134	0.699883	0.0749519	0.886134
NFKB1 (FPKM)	0.182217	0.0581575	0.00079422	0.656082		0.557684	0.0284259	0.415071	0.255022	0.95596	0.0129232	0.366344	0.0237755	0.378914	0.0219007
NFKB2 (FPKM)	0.0666567	0.00113644	0.154234	0.499001	0.557684		0.192767	0.0839387	0.443418	0.163496	0.224952	0.26075	0.114179	0.434825	0.0251296
REL (FPKM)	0.470298	0.163472	0.0339678	0.863147	0.0284259	0.192767		0.0425155	0.834683	0.800385	0.0457045	0.991026	0.121473	0.817079	0.0457045
RELA (FPKM)	0.077623	0.12472	0.0850369	0.404311	0.415071	0.0839387	0.0425155		0.297456	0.391163	0.140439	0.973891	0.319405	0.391163	0.0555517
RELB (FPKM)	0.0850369	0.404311	0.0706769	0.935084	0.255022	0.443418	0.834683	0.297456		0.886134	0.121473	0.0488816	0.11541	0.404188	0.0666567
∆NF-κB activation by MTX (9h)	0.766437	0.11541	0.766437	0.470802	0.95596	0.163496	0.800385	0.391163	0.886134		0.331041	0.255964	0.391163	0.68316	0.766437
∆NF-κB activation by TNF-α (9h)	0.0117658	0.0628454	0.00134661	0.513713	0.0129232	0.224952	0.0457045	0.140439	0.121473	0.331041		0.147359	1.0977e-05	0.41687	0.000334997
∆NF-κB activation by MTX (16h)	0.236687	0.603894	0.255964	0.886134	0.366344	0.26075	0.991026	0.973891	0.0488816	0.255964	0.147359		0.0457045	0.0708065	0.109783
∆NF-κB activation by TNF-α (16h)	0.0237755	0.0488816	0.00491497	0.699883	0.0237755	0.114179	0.121473	0.319405	0.11541	0.391163	1.0977e-05	0.0457045		0.297333	0.0001542
∆NF-κB activation by MTX (24h)	0.457295	0.297333	0.817079	0.0749519	0.378914	0.434825	0.817079	0.391163	0.404188	0.68316	0.41687	0.0708065	0.297333		0.147359
∆NF-κB activation by TNF-α (24h)	0.0278011	0.00553262	0.00381307	0.886134	0.0219007	0.0251296	0.0457045	0.0555517	0.0666567	0.766437	0.000334997	0.109783	0.0001542	0.147359
